# Supplementary material for: Effects of Diabetes and Voluntary Exercise on IgA Concentration and Polymeric Immunoglobulin Receptor Expression in the Submandibular Gland of Rats
Source: MDPI journal article supplement (doi:10.3390/medicina59040789), 2023-04-18
Supplement: s1 [file s1]

Supplemental Table S1. Primers used for analysis of gene expression in the submandibular gland (SG)

| Target gene                                               | Primer sequence (5'-3')   |                      |
|-----------------------------------------------------------|---------------------------|----------------------|
|                                                           | Forward                   | Reverse              |
| poli-IgR <sup>*</sup>                                     | CAGTCCTCGAAGGAAAAGATGAAAT | CAGGAATGCTGAGTAGGCCA |
| <i>Gapdh</i>                                              | GTATCGGACGCCTGGTTAC       | CTTGCCGTGGGTAGAGTCAT |
| poli-IgR <sup>*</sup> : polymeric immunoglobulin receptor |                           |                      |
